1

## 2 **Reverse engineering neural networks to characterise their cost functions**

3

4 Takuya Isomura<sup>1</sup>, Karl Friston<sup>2</sup>

5 1 Laboratory for Neural Computation and Adaptation, RIKEN Center for Brain Science, Wako,  
6 Saitama 351-0198, Japan

7 2 Wellcome Centre for Human Neuroimaging, Institute of Neurology, University College  
8 London, 12 Queen Square, London, WC1N 3AR, UK

9 Corresponding author email: [takuya.isomura@riken.jp](mailto:takuya.isomura@riken.jp)

10

11

### 12 **Abstract**

13 This work considers a class of biologically plausible cost functions for neural networks, where  
14 the same cost function is minimised by both neural activity and plasticity. In brief, we show  
15 that such cost functions can be cast as a variational bound on model evidence, or marginal  
16 likelihood, under an implicit generative model. Using generative models based on Markov  
17 decision processes (MDP), we show, analytically, that neural activity and plasticity perform  
18 Bayesian inference and learning, respectively, by maximising model evidence. Using  
19 mathematical and numerical analyses, we then confirm that biologically plausible cost  
20 functions—used in neural networks—correspond to variational free energy under some prior  
21 beliefs about the prevalence of latent states generating inputs. These prior beliefs are  
22 determined by particular constants (i.e., thresholds) that define the cost function. This  
23 means that the Bayes optimal encoding of latent or hidden states is achieved when, and only  
24 when, the network's implicit priors match the process generating inputs. Our results suggest  
25 that when a neural network minimises its cost function, it is implicitly minimising variational  
26 free energy under optimal or sub-optimal prior beliefs. This insight is potentially important  
27 because it suggests that any free parameter of a neural network's cost function can itself be  
28 optimised—by minimisation with respect to variational free energy.

29

30 **Keywords:** free-energy principle, variational Bayesian inference, learning algorithm, synaptic  
31 plasticity, Markov decision process, blind source separation

32

33

## 34 Introduction

35 Cost functions are used to solve problems in various scientific fields—including physics,  
36 chemistry, engineering and machine learning. Furthermore, any optimisation problem that  
37 can be specified using a cost function can be formulated as a gradient descent; enabling one  
38 to treat neuronal dynamics and plasticity as an optimisation process. Neuroscience  
39 commonly uses cost functions to express various types of learning: for instance, supervised  
40 learning to minimise the differences between outputs and targets, as in a perceptron (Marr,  
41 1969; Albus, 1971); reinforcement learning to maximise future reward (Schultz et al., 1997;  
42 Sutton & Barto, 1998), and unsupervised learning to maximise the efficiency of encoding  
43 (Linsker, 1988; Brown et al., 2001). These examples highlight the importance of specifying a  
44 problem or function in terms of cost functions, from which neural and synaptic dynamics can  
45 be derived. In other words, cost functions offer a formal (i.e., normative) expression of the  
46 purpose of a neural network and prescribe the dynamics of that neural network. Crucially,  
47 once the cost function has been established, it is no longer necessary to consider the  
48 dynamics. We can, instead, characterise the neural network's behaviour in terms of fixed  
49 points, transients, attractors and structural stability—based on and only on the cost function.  
50 In short, it is important to identify the cost function for a neural network to understand its  
51 dynamics, plasticity, and function.

52 A ubiquitous cost function in neurobiology, theoretical biology, and machine learning is  
53 model evidence, or equivalently, marginal likelihood or surprise; namely, the probability of  
54 some input or data under a model of how those inputs were generated by unknown or  
55 hidden causes. Generally, the evaluation of surprise is intractable. However, this evaluation  
56 can be converted into an optimisation problem by inducing a variational bound on surprise.  
57 In machine learning, this is known as an evidence lower bound (ELBO), while the same  
58 quantity is known as variational free energy in statistical physics and theoretical  
59 neurobiology.

60 Variational free energy minimisation is a candidate principle governing neuronal activity  
61 and synaptic plasticity (Friston et al., 2006; Friston, 2010). Here, surprise reflects the  
62 improbability of sensory inputs, given a model of how those inputs were caused. In turn,  
63 minimising variational free energy, as a proxy for surprise, corresponds to inferring the  
64 (unobservable) causes of (observable) consequences. To the extent that biological systems  
65 minimise variational free energy, it is possible to say that they infer the hidden states that  
66 generate their sensory inputs (Helmholtz, 1925; Knill & Pouget, 2004; DiCarlo et al., 2012)  
67 and consequently predict those inputs (Rao & Ballard, 1999; Friston, 2005). This is generally  
68 referred to as perceptual inference based upon an internal generative model about the  
69 external world (Dayan et al., 1995; George & Hawkins, 2009; Bastos et al., 2012).

70 Variational free energy minimisation provides a unified mathematical formulation of these  
71 inference and learning processes in terms of self-organising neural networks that function as  
72 Bayes optimal encoders. Moreover, organisms can use the same cost function to control their  
73 surrounding environment by sampling predicted (i.e., preferred) inputs. This is known as

74 active inference (Friston et al., 2011). The ensuing free-energy principle suggests that active  
75 inference and learning are mediated by changes in neural activity, synaptic strengths, and the  
76 behaviour of an organism to minimise variational free energy, as a proxy for surprise.  
77 Crucially, variational free energy and model evidence rest upon a generative model of  
78 continuous or discrete hidden states. A number of recent studies have used Markov decision  
79 process (MDP) generative models to elaborate schemes that minimise variational free energy  
80 (Friston, FitzGerald et al., 2016; Friston, FitzGerald et al., 2017; Friston, Parr et al., 2017). This  
81 minimisation reproduces various interesting dynamics and behaviours of real neuronal  
82 networks and biological organisms. However, it remains to be established whether  
83 variational free energy minimisation is an apt explanation for any given neural network, as  
84 opposed to optimisation of alternative cost functions.

85 In principle, any neural network that produces an output or a decision can be regarded as  
86 performing some form of inference in terms of Bayesian decision theory. On this reading, the  
87 complete class theorem suggests that any neural network could be regarded as performing  
88 Bayesian inference under some prior beliefs; therefore, it could be regarded as minimising  
89 variational free energy. The complete class theorem (Wald, 1947; Brown, 1981) says that for  
90 any pair of decisions and cost functions, there are some prior beliefs (implicit in the  
91 generative model) that render the decisions Bayes optimal. This suggests that it should be  
92 theoretically possible to identify an implicit generative model within any neural network  
93 architecture, which renders its cost function a variational free energy or ELBO. In what  
94 follows, we show that such an identification is possible for a fairly canonical form of neural  
95 network and a generic form of generative model.

96 In brief, we adopt a reverse engineering approach to identify a plausible cost function for  
97 neural networks—and show that the resulting cost function is formally equivalent to  
98 variational free energy. For simplicity, we focus on blind source separation (BSS); namely the  
99 problem of separating sensory inputs into multiple hidden sources or causes (Belouchrani et  
100 al., 1997; Cichocki et al., 2009; Comon & Jutten, 2010), which provides the minimum setup  
101 for modelling causal inference. We have previously observed BSS performed by *in vitro*  
102 neural networks (Isomura et al., 2015) and have reproduced this self-supervised process  
103 using an MDP and variational free energy minimisation (Isomura & Friston, 2018). These  
104 works suggest that variational free energy minimisation offers a plausible account of  
105 empirical behaviour of *in vitro* networks.

106 In this work, we ask whether variational free energy minimisation can account for the  
107 normative behaviour of any neural network, by considering all possible cost functions (i.e.,  
108 possible purposes). Using mathematical analysis, we identify a class of cost functions—from  
109 which update rules for both neural activity and synaptic plasticity can be derived—when a  
110 single-layer feed-forward neural network comprises firing rate neurons with sigmoid  
111 activation. The gradient descent on the ensuing cost function leads naturally to Hebbian  
112 plasticity with an activity-dependent homeostatic term. We show that these cost functions  
113 are formally homologous to variational free energy, under an MDP. Finally, we discuss the

114 implications of this result for explaining the empirical behaviour of neuronal networks, in  
 115 terms of free energy minimisation under particular prior beliefs.

116

## 117 **Methods**

118 In this section, we first derive the form of a variational free energy cost function under a  
 119 specific generative model; namely a Markov decision process<sup>1</sup>. We will go through the  
 120 derivations carefully, with a focus on the form of the ensuing Bayesian belief updating. The  
 121 form of this updating will re-emerge later, when reverse engineering the cost functions  
 122 implicit in neural networks. This section starts with a description of Markov decision  
 123 processes—as a general kind of generative model—and then considers the minimisation of  
 124 variational free energy under these models.

125 **Generative models.** Under an MDP scheme (Fig. 1A), a minimal BSS setup—in a  
 126 discrete-space—can be expressed as the likelihood mapping ( $A$ ) from  $N$  hidden sources or  
 127 states  $s_t \equiv s_{t1} \otimes \cdots \otimes s_{tN}$  to  $M$  observations  $o_t \equiv o_{t1} \otimes \cdots \otimes o_{tM}$  (using the outer product  
 128 operator  $\otimes$ ). Each source and observation take one (ON state) or zero (OFF state) values for  
 129 each time step ( $s_{tk} \in \{0,1\}, o_{ti} \in \{0,1\}$ ). Throughout this manuscript,  $k$  indices the  $k$ -th  
 130 hidden state, while  $i$  indices the  $i$ -th observation. The probability of  $s_t$  follows a categorical  
 131 distribution  $P(s_t) = P(s_{t1}) \cdots P(s_{tN}) = \text{Cat}(D_1) \cdots \text{Cat}(D_N)$ , where  $D_k \equiv (D_{k1}, D_{k0})$  with  
 132  $D_{k1} + D_{k0} = 1$ .

133 The probability of an outcome is determined by the likelihood mapping, from hidden  
 134 states to observations, in terms of a categorical distribution  $A$ :  $P(o_{ti}|s_t, A_i) = \text{Cat}(A_i)$ ,  
 135 where the elements of  $A_i$  are given by  $A_{ijl_1 \dots l_N} = P(o_{ti} = j | s_{t1} = l_1, \dots, s_{tN} = l_N, A)$ . This  
 136 determines the probability of  $o_{ti}$  takes  $j \in \{0,1\}$  when  $s_t = (l_1, \dots, l_N)$ . The prior  
 137 distribution of  $A_i$  is defined by Dirichlet distribution  $P(A_i) = \text{Dir}(a_i)$  with sufficient  
 138 statistics (concentration parameter)  $a_i$ . We use  $\tilde{o} \equiv (o_1, \dots, o_t)$  to denote a sequence of  
 139 observations and  $\tilde{s} \equiv (s_1, \dots, s_t)$  a sequence of hidden states. Formally, the generative  
 140 model (i.e., the joint distribution over outcomes, hidden states and the parameters of their  
 141 likelihood mapping) is expressed as

$$142 \quad P(\tilde{o}, \tilde{s}, A) = P(A) \prod_{\tau=1}^t P(o_{\tau}|s_{\tau}, A) P(s_{\tau}) = \prod_{i=1}^M P(A_i) \cdot \prod_{\tau=1}^t P(s_{\tau}) \prod_{i=1}^M P(o_{\tau i}|s_{\tau}, A_i). \quad (1)$$

143

---

<sup>1</sup> Strictly speaking, the generative model used in this paper is a hidden Markov model (HMM) because we do not consider probabilistic transitions between hidden states that depend upon control variables. However, for consistency with the literature on variational treatments of discrete state space models, we retain the MDP formalism; noting that we are using a special case (with unstructured state transitions).

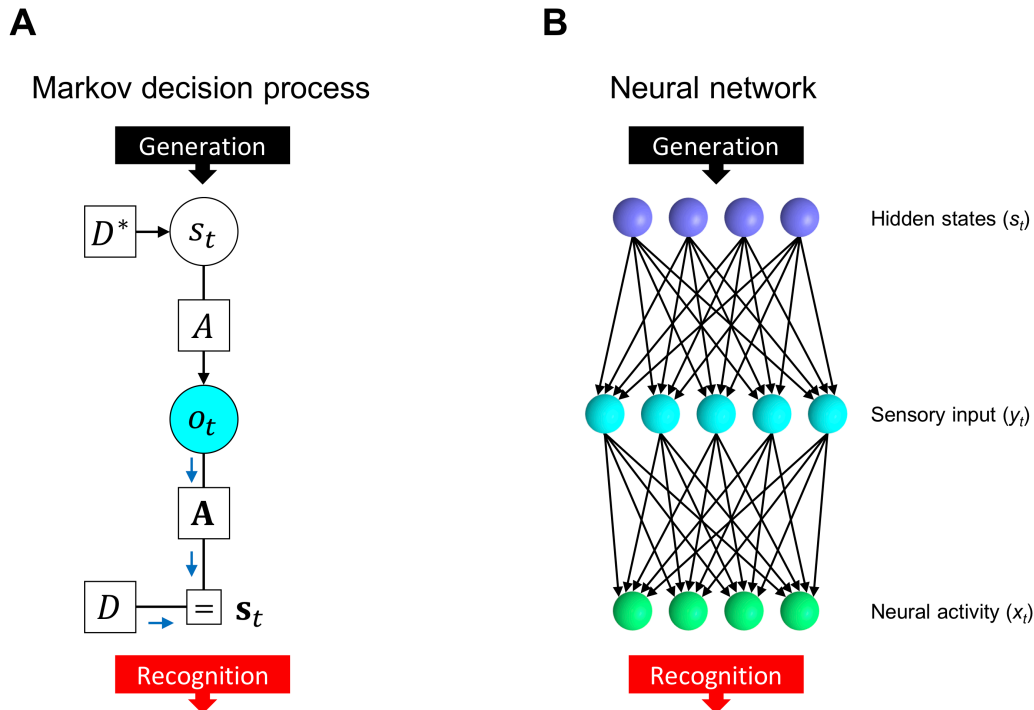

144

145 **Figure 1.** Comparison between an MDP scheme and a neural network. (A) MDP scheme  
 146 expressed as a Forney factor graph (Forney, 2001; Dauwels, 2007) based upon the  
 147 formulation in (Friston, Parr et al., 2017). In this BSS setup, the prior  $D$  determines hidden  
 148 states  $s_t$  and  $s_t$  determines observation  $o_t$  through the likelihood mapping  $A$ . Inference  
 149 corresponds to the inversion of this generative process. Here  $D^*$  indicates the true prior  
 150 while  $D$  indicates the prior that the network operates under. If  $D = D^*$ , inference would be  
 151 optimal and biased otherwise. (B) Neural network comprising a single layer feed-forward  
 152 network with a sigmoid activation function. The network receives sensory inputs  $y_t =$   
 153  $(y_{t1}, \dots, y_{tM})$  that are generated from hidden states  $s_t = (s_{t1}, \dots, s_{tN})$  and outputs neural  
 154 activities  $x_t = (x_{t1}, \dots, x_{tN})$ . Here,  $y_{ti}$  corresponds to a binary outcome  $o_{ti}$ , and  $x_{tk}$  should  
 155 encode the posterior expectation about a binary state  $s_{tk}$ .

156

157 **Minimisation of variational free energy.** In this MDP scheme, the aim is to minimise surprise  
 158 or, equivalently, maximise marginal likelihood by minimising variational free energy; i.e.,  
 159 performing approximate or variational Bayesian inference. From the generative model, we  
 160 can motivate a mean-field approximation to the posterior (recognition) density as follows

161 
$$Q(\tilde{s}, A) = Q(A)Q(\tilde{s}) = \prod_{i=1}^M Q(A_i) \cdot \prod_{\tau=1}^t Q(s_\tau), \quad (2)$$

162 where the marginal posterior distributions of  $s_t$  and  $A$  are categorical  $Q(s_\tau) = \text{Cat}(\mathbf{s}_\tau)$  and  
 163 Dirichlet  $Q(A_i) = \text{Dir}(\mathbf{a}_i)$  distributions, respectively. Note that  $\mathbf{s}_\tau$  and  $\mathbf{a}_i$  denote  
 164 sufficient statistics (i.e.,  $\mathbf{s}_\tau$  gives expectations between zero and one, and  $\mathbf{a}_i$  expresses the

165 concentration parameter). Below, we use the posterior expectation of  $\ln A_i$  to encode  
 166 posterior beliefs about the likelihood, which is given by

$$167 \quad \ln \mathbf{A}_i \equiv \mathbb{E}_{Q(A_i)}[\ln A_i] = \psi(\mathbf{a}_i) - \psi(\mathbf{a}_{i1} + \mathbf{a}_{i0}) = \ln \mathbf{a}_i - \ln(\mathbf{a}_{i1} + \mathbf{a}_{i0}) + \mathcal{O}(\mathbf{a}_i^{-1}) \quad (3)$$

168 using the digamma function  $\psi(\cdot)$ . Here  $\mathbb{E}_{Q(A_i)}[\cdot]$  denotes the expectation over  $Q(A_i)$ . The  
 169 variational free energy of this generative model is then given by:

$$170 \quad F(\tilde{\delta}, Q(\tilde{s}), Q(A))$$

$$171 \quad \equiv \sum_{\tau=1}^t \{ \mathbb{E}_{Q(s_\tau)Q(A)}[-\ln P(o_\tau | s_\tau, A)] + \mathcal{D}_{\text{KL}}[Q(s_\tau) || P(s_\tau)] \} + \mathcal{D}_{\text{KL}}[Q(A) || P(A)]$$

$$172 \quad = \underbrace{\sum_{\tau=1}^t \mathbf{s}_\tau \cdot \{-\ln \mathbf{A} \cdot o_\tau + \ln \mathbf{s}_\tau - \ln D\}}_{\text{accuracy+state complexity}} + \underbrace{\sum_{i=1}^M \{(\mathbf{a}_i - a_i) \cdot \ln \mathbf{A}_i - \ln \mathcal{B}(\mathbf{a}_i)\}}_{\text{parameter complexity}}, \quad (4)$$

173 where  $\mathcal{D}_{\text{KL}}[\cdot || \cdot]$  is complexity as scored by the Kullback-Leibler divergence (Kullback &  
 174 Leibler, 1951) and  $\mathcal{B}(\mathbf{a}_i) \equiv \Gamma(\mathbf{a}_{i1})\Gamma(\mathbf{a}_{i0})/\Gamma(\mathbf{a}_{i1} + \mathbf{a}_{i0})$  is the beta function. The first term in  
 175 the final equality comprises accuracy and the state complexity, which increases in proportion  
 176 to time  $t$ . Conversely, the second term—the complexity of parameters—increases in the  
 177 order of  $\ln t$  and is thus negligible when  $t$  is large (see Supplementary Methods S1 for  
 178 details). In what follows, we will therefore drop parameter complexity, under the assumption  
 179 that the scheme has experienced a sufficient number of outcomes.

180 Inference optimises posterior expectations about the hidden states by minimising  
 181 variational free energy. The optimal posterior expectations are obtained by solving the  
 182 variation of  $F$  to give:

$$183 \quad \mathbf{s}_{tk} = \sigma(\ln \mathbf{A}_{..k} \cdot o_t + \ln D_k), \quad (5)$$

184 where  $\sigma(\cdot)$  is the softmax function. As  $s_{tk}$  is a binary value in this study, the posterior  
 185 expectation of  $s_{tk}$  taking a value of one (ON state) can be expressed as

$$186 \quad \mathbf{s}_{tk1} = \frac{\exp(\ln \mathbf{A}_{..k1} \cdot o_t + \ln D_{k1})}{\exp(\ln \mathbf{A}_{..k1} \cdot o_t + \ln D_{k1}) + \exp(\ln \mathbf{A}_{..k0} \cdot o_t + \ln D_{k0})}$$

$$187 \quad = \text{sig}(\ln \mathbf{A}_{..k1} \cdot o_t - \ln \mathbf{A}_{..k0} \cdot o_t + \ln D_{k1} - \ln D_{k0}) \quad (6)$$

188 using the sigmoid function  $\text{sig}(z) \equiv 1/(1 + \exp(-z))$ . (The posterior expectation of  $s_{tk}$   
 189 taking a value 0 (OFF state) is thus  $\mathbf{s}_{tk0} = 1 - \mathbf{s}_{tk1}$ .) Here,  $D_{k1}$  and  $D_{k0}$  are constants  
 190 denoting the prior beliefs about hidden states. Bayes optimal encoding is obtained when,  
 191 and only when, the prior beliefs match the genuine prior distribution; i.e.,  $D_{k1} = D_{k0} = 0.5$   
 192 in this BSS setup. This concludes our treatment of inference about hidden states under this  
 193 minimal scheme. Note that the updates in Equation (5) have a biological plausibility in the  
 194 sense that the expectations can be associated with nonnegative firing rates, while the

195 arguments of the sigmoid (softmax) function can be associated with neuronal depolarisation;  
 196 rendering the softmax function a voltage-firing rate activation function

197 In terms of learning, the optimal posterior expectations about the parameters are given  
 198 by:

$$199 \quad \mathbf{a}_i = a_i + \sum_{\tau=1}^t o_{\tau i} \otimes \mathbf{s}_{\tau} = a_i + \overline{o_{\tau i} \otimes \mathbf{s}_{\tau}}, \quad (7)$$

200 where  $a_i$  is the prior,  $\otimes$  expresses the operator of outer product, and  $\overline{o_{\tau i} \otimes \mathbf{s}_{\tau}} \equiv$   
 201  $\sum_{\tau=1}^t o_{\tau i} \otimes \mathbf{s}_{\tau}$ . Thus, the optimal posterior expectation of matrix  $\mathbf{A}$  is  $\mathbf{A}_{..k} = \mathbf{a}_{..k} / (\mathbf{a}_{.1k} + \mathbf{a}_{.0k})$ ,  
 202 or equivalently

$$203 \quad \begin{cases} \mathbf{A}_{.1k1} = \frac{\mathbf{a}_{.1k1}}{\mathbf{a}_{.1k1} + \mathbf{a}_{.0k1}} = \frac{\overline{o_{t.1} \mathbf{s}_{tk1}}}{\overline{\mathbf{s}_{tk1}}} + \mathcal{O}\left(\frac{1}{t}\right) \\ \mathbf{A}_{.1k0} = \frac{\mathbf{a}_{.1k0}}{\mathbf{a}_{.1k0} + \mathbf{a}_{.0k0}} = \frac{\overline{o_{t.1}(1 - \mathbf{s}_{tk1})}}{\overline{1 - \mathbf{s}_{tk1}}} + \mathcal{O}\left(\frac{1}{t}\right) \end{cases}, \quad (8)$$

204 where  $\overline{o_{t.1} \mathbf{s}_{tk1}} = \sum_{\tau=1}^t o_{\tau.1} \mathbf{s}_{\tau k1}$ ,  $\overline{\mathbf{s}_{tk1}} = \sum_{\tau=1}^t \mathbf{s}_{\tau k1}$ ,  $\overline{o_{t.1}(1 - \mathbf{s}_{tk1})} = \sum_{\tau=1}^t o_{\tau.1}(1 - \mathbf{s}_{\tau k1})$ ,

205 and  $\overline{1 - \mathbf{s}_{tk1}} = \sum_{\tau=1}^t (1 - \mathbf{s}_{\tau k1})$ . Whereas,  $\mathbf{A}_{.0k1} = \vec{1} - \mathbf{A}_{.1k1}$  and  $\mathbf{A}_{.0k0} = \vec{1} - \mathbf{A}_{.1k0}$ . Here

206  $\vec{1} = (1, \dots, 1) \in \mathbb{R}^M$  is a vector of ones. The prior of parameters  $a_i$  is in the order of 1 and

207 thus negligible when  $t$  is large. The four vectors  $(\mathbf{A}_{.1k1}, \mathbf{A}_{.1k0}, \mathbf{A}_{.0k1}, \mathbf{A}_{.0k0})$  express the  
 208 optimal posterior expectations of  $o_t$  taking ON state when  $s_{tk}$  is ON ( $\mathbf{A}_{.1k1}$ ) or OFF ( $\mathbf{A}_{.1k0}$ ),  
 209 or  $o_t$  taking OFF state when  $s_{tk}$  is ON ( $\mathbf{A}_{.0k1}$ ) or OFF ( $\mathbf{A}_{.0k0}$ ). Although this expression may  
 210 look complicated, it is fairly straightforward: the posterior expectations of the likelihood  
 211 simply accumulate posterior expectations about the co-occurrence of states and their  
 212 outcomes. These accumulated (Dirichlet) parameters are then normalised to give a likelihood  
 213 or probability. Crucially, one can see the associative or Hebbian aspect of this belief  
 214 updating; expressed here in terms of the outer products between (presynaptic) expectations  
 215 about states and (postsynaptic) outcomes in Equation (7). We now turn to the equivalent  
 216 updating for activities and parameters or weights of a neural network.

217

218 **Neural activity and Hebbian plasticity models.** Next, we consider the neural activity and  
 219 synaptic plasticity in the neural network (Fig. 1B). We will assume that the  $k$ -th neuron's  
 220 activity  $x_{tk}$  is given by

$$221 \quad \dot{x}_{tk} \propto -f'(x_{tk}) + W_{k1}y_t - W_{k0}y_t + h_{k1} - h_{k0}, \quad (9)$$

222 where  $y_t \equiv (y_{t1}, \dots, y_{tM})^T = (o_{t11}, \dots, o_{tM1})^T$  is a column vector of inputs that encodes the



223 ON states of  $o_t$ . We suppose  $W_{k1} \in \mathbb{R}^M$  and  $W_{k0} \in \mathbb{R}^M$  comprise row vectors of synapses,  
 224 and  $h_{k1} \in \mathbb{R}$  and  $h_{k0} \in \mathbb{R}$  are adaptive thresholds that depend on the values of  $W_{k1}$  and  
 225  $W_{k0}$ , respectively. One may think  $W_{k1}$  and  $W_{k0}$  express excitatory and inhibitory synapses,  
 226 respectively. We will further assume that the nonlinear leakage  $f'(\cdot)$  is the inverse of the  
 227 sigmoid function, such that the fixed point of  $x_{tk}$  is given by

$$\begin{aligned}
 228 \quad x_{tk} &= \text{sig}(W_{k1}y_t - W_{k0}y_t + h_{k1} - h_{k0}) \\
 229 \quad &= \frac{\exp(W_{k1}y_t + h_{k1})}{\exp(W_{k1}y_t + h_{k1}) + \exp(W_{k0}y_t + h_{k0})}. \quad (10)
 \end{aligned}$$

230 We further assume that synaptic strengths are updated following Hebbian plasticity, with an  
 231 activity-dependent homeostatic term, as follows:

$$232 \quad \begin{cases} \Delta W_{k1}(t) \equiv W_{k1}(t+1) - W_{k1}(t) \propto \text{Hebb}_1(x_{tk}, y_t, W_{k1}) + \text{Home}_1(x_{tk}, W_{k1}) \\ \Delta W_{k0}(t) \equiv W_{k0}(t+1) - W_{k0}(t) \propto \text{Hebb}_0(x_{tk}, y_t, W_{k0}) + \text{Home}_0(x_{tk}, W_{k0}) \end{cases} \quad (11)$$

233 where  $\text{Hebb}_1$  and  $\text{Hebb}_0$  mediate Hebbian plasticity as determined by the product of  
 234 sensory inputs and neural outputs, and  $\text{Home}_1$  and  $\text{Home}_0$  are homeostatic plasticity  
 235 determined by output neural activity.

236 In the MDP scheme, posterior expectations about hidden states and parameters are  
 237 usually associated with neural activity and synaptic strengths. Here, we can see a formal  
 238 similarity between the solutions for expectations about states (Equation (6)) and activity in  
 239 the neural network (Equation (10)). By this analogy,  $x_{tk}$  can be regarded as encoding the  
 240 posterior expectation of the ON state  $\mathbf{s}_{tk1}$ , and  $W_{k1}$  and  $W_{k0}$  correspond to  $\ln \mathbf{A}_{\cdot 1k1} -$   
 241  $\ln(\vec{1} - \mathbf{A}_{\cdot 1k1}) = \text{sig}^{-1}(\mathbf{A}_{\cdot 1k1})$  and  $\ln \mathbf{A}_{\cdot 1k0} - \ln(\vec{1} - \mathbf{A}_{\cdot 1k0}) = \text{sig}^{-1}(\mathbf{A}_{\cdot 1k0})$ , respectively;  
 242 in the sense that they express the amplitude of  $y_t = o_{t\cdot 1}$  influencing  $x_{tk}$ .

243 The optimal posterior expectation of a hidden state taking a value of one (Equation (6)) is  
 244 given by the ratio of the beliefs about ON and OFF states, expressed as a sigmoid function.  
 245 Thus, to be a Bayes optimal encoder, the fixed point of neural activity needs to be a sigmoid  
 246 function. This is assured when  $f'(x_{tk})$  is the inverse of the sigmoid function (see Equation  
 247 (13) below). Under this condition the fixed point or solution for  $x_{tk}$  is given by Equation  
 248 (10), which compares inputs from ON and OFF pathways. This means  $x_{tk}$  encodes the  
 249 posterior expectation of the  $k$ -th hidden state being ON—that is,  $x_{tk} \rightarrow \mathbf{s}_{tk1}$ . In short, the  
 250 neural network is effectively inferring the hidden state.

251 If the activity of the neural network is performing inference, does the Hebbian plasticity  
 252 correspond to Bayes optimal learning? In other words, does the synaptic update rule in  
 253 Equation (11) ensure neural activity and synaptic strengths asymptotically encode Bayesian  
 254 optimal posterior beliefs about hidden states ( $x_{tk} \rightarrow \mathbf{s}_{tk1}$ ) and parameters ( $W_{k1} \rightarrow$   
 255  $\text{sig}^{-1}(\mathbf{A}_{\cdot 1k1})$ ), respectively? To address this, we will identify a class of cost functions from  
 256 which the neural activity and synaptic plasticity can be derived and consider the conditions  
 257 under which the cost function becomes consistent with variational free energy.



258 **Neural network cost functions.** Here, we consider a class of functions that constitute a cost  
 259 function for both neural activity and synaptic plasticity. We start by assuming that the update  
 260 of  $k$ -th neuron's activity (Equation (9)) is determined by the gradient of cost function  $L_k$ ,  
 261  $\dot{x}_{tk} \propto -\partial L_k / \partial x_{tk}$ . By integrating the right-hand side of Equation (9), we obtain a class of  
 262 cost functions as

$$\begin{aligned}
 263 \quad L_k &= \sum_{\tau=1}^t (f(x_{\tau k}) - x_{\tau k} W_{k1} y_{\tau} - (1 - x_{\tau k}) W_{k0} y_{\tau} - x_{\tau k} h_{k1} - (1 - x_{\tau k}) h_{k0}) + \mathcal{O}(1) \\
 264 \quad &= \sum_{\tau=1}^t \left( f(x_{\tau k}) - \begin{pmatrix} x_{\tau k} \\ 1 - x_{\tau k} \end{pmatrix}^T \begin{pmatrix} W_{k1} \\ W_{k0} \end{pmatrix} y_{\tau} + \begin{pmatrix} h_{k1} \\ h_{k0} \end{pmatrix} \right) + \mathcal{O}(1), \quad (12)
 \end{aligned}$$

265 where  $\mathcal{O}(1)$  depends on  $W_{k1}$  and  $W_{k0}$  that is of smaller order than  $\mathcal{O}(t)$  and thus  
 266 negligible when  $t$  is large. The cost function of the entire network is defined by  $L \equiv \sum_{k=1}^N L_k$ .  
 267 When  $f'(x_{\tau k})$  is the inverse of the sigmoid function, we have

$$268 \quad f(x_{\tau k}) = x_{\tau k} \ln x_{\tau k} + (1 - x_{\tau k}) \ln(1 - x_{\tau k}) \quad (13)$$

269 up to a constant term. We further assume that the synaptic weight update rule is derived  
 270 from the same cost function  $L_k$ . Thus, the synaptic plasticity is given by

$$271 \quad \begin{cases} \dot{W}_{k1} \propto -\frac{\partial L_k}{\partial W_{k1}} = \overline{x_{tk} y_t} + \overline{x_{tk}} h'_{k1} \\ \dot{W}_{k0} \propto -\frac{\partial L_k}{\partial W_{k0}} = \overline{(1 - x_{tk}) y_t} + \overline{1 - x_{tk}} h'_{k0} \end{cases}, \quad (14)$$

272 where  $\overline{x_{tk} y_t} \equiv \sum_{\tau=1}^t x_{\tau k} y_{\tau}$ ,  $\overline{x_{tk}} \equiv \sum_{\tau=1}^t x_{\tau k}$ ,  $\overline{(1 - x_{tk}) y_t} \equiv \sum_{\tau=1}^t (1 - x_{\tau k}) y_{\tau}$ ,  $\overline{1 - x_{tk}} \equiv$   
 273  $\sum_{\tau=1}^t (1 - x_{\tau k})$ ,  $h'_{k1} \equiv \partial h_{k1} / \partial W_{k1}$ , and  $h'_{k0} \equiv \partial h_{k0} / \partial W_{k0}$ . Note that the update of  $W_{k1}$  is  
 274 not directly influenced by  $W_{k0}$ , and *vice versa*; since they encode parameters in physically  
 275 distinct pathways (i.e., the updates are local learning rules (Lee et al., 2000)). The update rule  
 276 for  $W_{k1}$  can be viewed as Hebbian plasticity mediated by an additional activity-dependent  
 277 term expressing homeostatic plasticity. Moreover, the update of  $W_{k0}$  can be viewed as  
 278 anti-Hebbian plasticity with a homeostatic term, in the sense that  $W_{k0}$  is reduced when  
 279 input ( $y_t$ ) and output ( $x_{tk}$ ) fire together. The fixed points of  $W_{k1}$  and  $W_{k0}$  are given by

$$280 \quad \begin{cases} W_{k1} = h_1'^{-1} \left( -\frac{\overline{x_{tk} y_t}}{\overline{x_{tk}}} \right) \\ W_{k0} = h_0'^{-1} \left( -\frac{\overline{(1 - x_{tk}) y_t}}{1 - \overline{x_{tk}}} \right) \end{cases}. \quad (15)$$

281 Crucially, these synaptic strength updates are a subclass of the general synaptic plasticity rule  
 282 in Equation (11); see also Supplementary Methods S2 for mathematical explanation.

283 Therefore, if the synaptic update rule is derived from the cost function that underwrites  
 284 neural activity, the synaptic update rule has a biologically plausible form, comprising Hebbian  
 285 plasticity and activity-dependent homeostatic plasticity.

286 **Comparison with variational free energy.** Here, we establish a formal relationship between  
 287 the cost function  $L$  and variational free energy. We define  $V_{k1} \equiv \text{sig}(W_{k1})$  and  $V_{k0} \equiv$   
 288  $\text{sig}(W_{k0})$  as nonlinear functions of synaptic strengths. We consider the case where neural  
 289 activity is expressed as a sigmoid function and thus Equation (13) holds. From  $W_{k1} =$   
 290  $\ln V_{k1} - \ln(\vec{1} - V_{k1})$ , Equation (12) becomes

$$291 \quad L = \sum_{k=1}^N \sum_{\tau=1}^t \begin{pmatrix} x_{\tau k} \\ 1 - x_{\tau k} \end{pmatrix}^T \left\{ \begin{pmatrix} \ln x_{\tau k} \\ \ln(1 - x_{\tau k}) \end{pmatrix} - \begin{pmatrix} \ln V_{k1} & \ln(\vec{1} - V_{k1}) \\ \ln V_{k0} & \ln(\vec{1} - V_{k0}) \end{pmatrix} \begin{pmatrix} y_{\tau} \\ \vec{1} - y_{\tau} \end{pmatrix} - \begin{pmatrix} h_{k1} \\ h_{k0} \end{pmatrix} \right. \\
 292 \quad \left. + \begin{pmatrix} \ln(\vec{1} - V_{k1}) \\ \ln(\vec{1} - V_{k0}) \end{pmatrix} \vec{1} \right\} + \mathcal{O}(1). \quad (16)$$

293 One can immediately see a formal correspondence between this cost function and  
 294 variational free energy (Equation (4)). That is, when we assume  $x_{tk} = \mathbf{s}_{tk1}$ ,  $V_{k1} = \mathbf{A}_{\cdot 1k1}$ ,  
 295 and  $V_{k0} = \mathbf{A}_{\cdot 1k0}$ , Equation (16) has exactly the same form as the sum of the accuracy and  
 296 state complexity (see the first term in the last equality of Equation (4)), which is the leading  
 297 order term of variational free energy.

298 Specifically, when the threshold  $h_{k1} = \ln(\vec{1} - V_{k1}) \cdot \vec{1} + \ln D_{k1}$  and  $h_{k0} = \ln(\vec{1} - V_{k0}) \cdot$   
 299  $\vec{1} + \ln D_{k0}$  hold, Equation (16) becomes equivalent to Equation (4) up to the  $\ln t$  order  
 300 term (that disappears when  $t$  is large). Therefore, in this special case, the fixed points of  
 301 neural activity and synaptic strengths become posterior expectations; thus,  $x_{tk}$   
 302 asymptotically becomes the Bayes optimal encoder for a large  $t$  limit (provided  $D_k$  matches  
 303 the genuine prior  $D_k^*$ ).

304 We can define  $\phi_{k1} \equiv h_{k1} - \ln(\vec{1} - V_{k1}) \cdot \vec{1}$  and  $\phi_{k0} \equiv h_{k0} - \ln(\vec{1} - V_{k0}) \cdot \vec{1}$  as  
 305 functions of  $W_{k1}$  and  $W_{k0}$ , respectively, and express the cost function as

$$306 \quad L = \sum_{k=1}^N \sum_{\tau=1}^t \begin{pmatrix} x_{\tau k} \\ 1 - x_{\tau k} \end{pmatrix}^T \left\{ \begin{pmatrix} \ln x_{\tau k} \\ \ln(1 - x_{\tau k}) \end{pmatrix} - \begin{pmatrix} \ln V_{k1} & \ln(\vec{1} - V_{k1}) \\ \ln V_{k0} & \ln(\vec{1} - V_{k0}) \end{pmatrix} \begin{pmatrix} y_{\tau} \\ \vec{1} - y_{\tau} \end{pmatrix} - \begin{pmatrix} \phi_{k1} \\ \phi_{k0} \end{pmatrix} \right\} + \mathcal{O}(1). \quad (17)$$

307 Here, we suppose—without loss of generality—that the constant terms in  $\phi_{k1}$  and  $\phi_{k0}$   
 308 are chosen to ensure  $\exp(\phi_{k1}) + \exp(\phi_{k0}) = 1$ . Under this condition,  
 309  $(\exp(\phi_{k1}), \exp(\phi_{k0}))$  can be viewed as the prior belief about hidden states

$$310 \quad \begin{cases} \phi_{k1} = \ln D_{k1} \\ \phi_{k0} = \ln D_{k0} \end{cases} \quad (18)$$

311 and thus Equation (17) is equivalent to the accuracy and state complexity terms of  
312 variational free energy.

313 In other words, when the prior belief about states  $(D_{k1}, D_{k0})$  is a function of the  
314 posterior expectation about parameters  $(\mathbf{A}_{\cdot 1k1}, \mathbf{A}_{\cdot 1k0})$ , the generic cost function under  
315 consideration can be expressed in the form of variational free energy, up to  $\mathcal{O}(\ln t)$  term. A  
316 generic cost function  $L$  is sub-optimal from the perspective of Bayesian inference unless  $\phi_{k1}$   
317 and  $\phi_{k0}$  are tuned appropriately to express the unbiased (i.e., optimal) prior belief. In this  
318 BSS setup,  $\phi_{k1} = \phi_{k0} = \text{const}$  is optimal; thus, a generic  $L$  would asymptotically give an  
319 upper bound of variational free energy with the optimal prior belief about states when  $t$  is  
320 large.

321 **Analysis on synaptic update rules.** For the purpose of explicitly solving the fixed point of  
322  $W_{k1}$  and  $W_{k0}$  that provide the global minimum of  $L$ , we suppose  $\phi_{k1}$  and  $\phi_{k0}$  as linear  
323 functions of  $W_{k1}$  and  $W_{k0}$ , respectively, given as

$$324 \quad \begin{cases} \phi_{k1} = \alpha_{k1} + W_{k0}\beta_{k1} \\ \phi_{k0} = \alpha_{k0} + W_{k0}\beta_{k0} \end{cases}, \quad (19)$$

325 where  $\alpha_{k1}, \alpha_{k0} \in \mathbb{R}$  and  $\beta_{k1}, \beta_{k0} \in \mathbb{R}^M$  are constants. By solving the variation of  $L$  with  
326 respect to  $W_{k1}$  and  $W_{k0}$ , we find the fixed point of synaptic strengths as

$$327 \quad \begin{cases} W_{k1} = \text{sig}^{-1}\left(\frac{\overline{x_{tk}y_t}}{\overline{x_{tk}}} + \beta_{k1}\right) \\ W_{k0} = \text{sig}^{-1}\left(\frac{(1-x_{tk})y_t}{1-x_{tk}} + \beta_{k0}\right) \end{cases}. \quad (20)$$

328 Since the update from  $t$  to  $t+1$  is expressed as  $\text{sig}(W_{k1} + \Delta W_{k1}) - \text{sig}(W_{k1}) =$   
329  $\text{sig}(W_{k1})(1 - \text{sig}(W_{k1}))\Delta W_{k1} + \mathcal{O}(|\Delta W_{k1}|^2)$  and  $\text{sig}(W_{k1} + \Delta W_{k1}) - \text{sig}(W_{k1}) \approx$

330  $x_{(t+1)k}y_{t+1}/\overline{x_{tk}} - x_{(t+1)k}\overline{x_{tk}y_t}/\overline{x_{tk}}^2 = x_{(t+1)k}y_{t+1}/\overline{x_{tk}} - (\text{sig}(W_{k1}) - \beta_{k1})x_{(t+1)k}/\overline{x_{tk}}$ , we

331 recover the following synaptic plasticity:

$$332 \quad \begin{cases} \Delta W_{k1} = \underbrace{\frac{\text{sig}(W_{k1})^{\odot -1} \odot (1 - \text{sig}(W_{k1}))^{\odot -1}}{\overline{x_{tk}}}}_{\text{adaptive learning rate}} \odot \left\{ \underbrace{\frac{x_{(t+1)k}y_{t+1}}{\overline{x_{tk}}}}_{\text{Hebbian plasticity}} - \underbrace{\frac{(\text{sig}(W_{k1}) - \beta_{k1})x_{(t+1)k}}{\overline{x_{tk}}}}_{\text{homeostatic plasticity}} \right\} \\ \Delta W_{k0} = \underbrace{\frac{\text{sig}(W_{k0})^{\odot -1} \odot (1 - \text{sig}(W_{k0}))^{\odot -1}}{1 - \overline{x_{tk}}}}_{\text{adaptive learning rate}} \odot \left\{ \underbrace{(1 - x_{(t+1)k})y_{t+1}}_{\text{anti-Hebbian plasticity}} - \underbrace{(\text{sig}(W_{k0}) - \beta_{k0})(1 - x_{(t+1)k})}_{\text{homeostatic plasticity}} \right\} \end{cases}, \quad (21)$$

333 where  $\odot$  denotes the element-wise (Hadamard) product and  $\text{sig}(W_{k1})^{\odot -1}$  indicates the

334 element-wise inverse of  $\text{sig}(W_{k1})$ . This synaptic plasticity rule is a subclass of the generic  
 335 synaptic plasticity rule in Equation (11).

336 In summary, under a few minimal assumptions and ignoring small contributions to weight  
 337 updates, the neural network under consideration can be regarded as minimising an  
 338 approximation to model evidence or marginal likelihood because the cost function can be  
 339 formulated in terms of variational free energy. In what follows, we will rehearse these  
 340 analytic results and then use numerical analyses to illustrate Bayes optimal inference (and  
 341 learning) in a neural network when, and only when, it has the right priors.

342

## 343 Results

344 **Analytical form of neural network cost functions.** The analysis of the preceding section rests  
 345 on the following assumptions:

346 (1) Updates of neural activity and synaptic weights are determined by a gradient descent on  
 347 a cost function  $L$ .

348 (2) Neural activity is updated by the weighted sum of sensory inputs and its fixed point is  
 349 expressed as the sigmoid function.

350 Under these assumptions, we can express the cost function for a neural network as follows  
 351 (see Equation (17)):

$$352 \quad L = \sum_{k=1}^N \left[ \sum_{\tau=1}^t \begin{pmatrix} x_{\tau k} \\ 1 - x_{\tau k} \end{pmatrix}^T \left\{ \begin{pmatrix} \ln x_{\tau k} \\ \ln(1 - x_{\tau k}) \end{pmatrix} - \begin{pmatrix} \ln V_{k1} & \ln(\vec{1} - V_{k1}) \\ \ln V_{k0} & \ln(\vec{1} - V_{k0}) \end{pmatrix} \begin{pmatrix} y_{\tau} \\ \vec{1} - y_{\tau} \end{pmatrix} - \begin{pmatrix} \phi_{k1} \\ \phi_{k0} \end{pmatrix} \right\} \right]$$

353  $+ \mathcal{O}(1),$

354 where  $V_{k1} = \text{sig}(W_{k1})$  and  $V_{k0} = \text{sig}(W_{k0})$  hold, and  $\phi_{k1}$  and  $\phi_{k0}$  are functions of  
 355  $W_{k1}$  and  $W_{k0}$ , respectively. The log likelihood function (accuracy term) and divergence of  
 356 hidden states (complexity term) of variational free energy emerge naturally under the  
 357 assumption of a sigmoid activation function. The cost function above has additional terms  
 358 denoted by  $\phi_{k1}$  and  $\phi_{k0}$ . In other words, we can say that the cost function  $L$  is variational  
 359 free energy under a sub-optimal prior belief about hidden states—depends on  $W_{k1}$  and  
 360  $W_{k0}$ :  $\ln P(s_{tk}) = \ln D_k = \phi_k$ , where  $\phi_k \equiv (\phi_{k1}, \phi_{k0})$ . This prior alters the landscape of  
 361 cost function in a sub-optimal manner and thus provides a biased solution for neural  
 362 activities and synaptic strengths, which differ from the Bayes optimal encoders.

363 For analytical tractability, we further assume the following:

364 (3) The perturbation terms ( $\phi_{k1}$  and  $\phi_{k0}$ ) that constitute the difference between cost  
 365 function and variational free energy with optimal prior beliefs can be expressed as linear  
 366 equations of  $W_{k1}$  and  $W_{k0}$ .

367 From assumption 3, Equation (17) becomes:

$$\begin{aligned}
 368 \quad L = & \sum_{k=1}^N \left[ \sum_{\tau=1}^t \begin{pmatrix} x_{\tau k} \\ 1 - x_{\tau k} \end{pmatrix}^T \left\{ \begin{pmatrix} \ln x_{\tau k} \\ \ln(1 - x_{\tau k}) \end{pmatrix} - \begin{pmatrix} \ln V_{k1} & \ln(\vec{1} - V_{k1}) \\ \ln V_{k0} & \ln(\vec{1} - V_{k0}) \end{pmatrix} \begin{pmatrix} y_{\tau} \\ \vec{1} - y_{\tau} \end{pmatrix} \right. \\
 369 \quad & \left. - \begin{pmatrix} \alpha_{k1} + W_{k1}\beta_{k1} \\ \alpha_{k0} + W_{k0}\beta_{k0} \end{pmatrix} \right\} \right] + \mathcal{O}(1), \\
 370 & \hspace{20em} (22)
 \end{aligned}$$

371 where  $\{\alpha_{k1}, \alpha_{k0}, \beta_{k1}, \beta_{k0}\}$  are constants. The cost function has degrees of freedom with  
 372 respect to the choice of constants  $\{\alpha_{k1}, \alpha_{k0}, \beta_{k1}, \beta_{k0}\}$ , which correspond to the prior belief  
 373 about states  $D_k$ . The neural activity and synaptic strengths that give the minimum of a  
 374 generic physiological cost function  $L$  are biased by these constants, which may be analogous  
 375 to physiological constraints.

376 The fixed point of synaptic strengths—that give the minimum of  $L$ —is given analytically as  
 377 Equation (20), expressing that  $(\beta_{k1}, \beta_{k0})$  deviates the centre of the nonlinear  
 378 mapping—from Hebbian products to synaptic strengths—from the optimal position (shown  
 379 in Equation (8)). As shown in Equation (14), the derivative of  $L$  with respect to  $W_{k1}$  and  
 380  $W_{k0}$  recovers the synaptic update rules that comprise Hebbian and activity-dependent  
 381 homeostatic terms. Although Equation (14) expresses the dynamics of synaptic strengths  
 382 that converge to the fixed point, it is consistent with a plasticity rule that gives the synaptic  
 383 change from  $t$  to  $t+1$  (Equation (21)).

384 Hence, based on assumptions 1 and 2, we find that the cost function approximates  
 385 variational free energy: see also Supplementary Table S1 for their correspondence. Under  
 386 this condition, neural activity encodes the posterior expectation about hidden states:  $x_{\tau k} =$   
 387  $\mathbf{s}_{\tau k1} = Q(s_{\tau k} = 1)$  and synaptic strengths encode the posterior expectation of the  
 388 parameters:  $V_{k1} = \text{sig}(W_{k1}) = \mathbf{A}_{\cdot 1k1}$  and  $V_{k0} = \text{sig}(W_{k0}) = \mathbf{A}_{\cdot 1k0}$ . In addition, based on  
 389 assumption 3, the accuracy of approximation depends on the deviation of constants  
 390  $\{\alpha_{k1}, \alpha_{k0}, \beta_{k1}, \beta_{k0}\}$  from their optimal values. From a Bayesian perspective, these constants  
 391 can be viewed as prior beliefs,  $\ln P(s_{tk}) = \ln D_k = (\alpha_{k1} + W_{k1}\beta_{k1}, \alpha_{k0} + W_{k0}\beta_{k0})$ , when  
 392 we assume  $(x_k, 1 - x_k)$  represents the state posterior  $\mathbf{s}_{tk}$ . When and only when  
 393  $(\alpha_{k1}, \alpha_{k0}) = (-\ln 2, -\ln 2)$  and  $(\beta_{k1}, \beta_{k0}) = (\vec{0}, \vec{0})$ , does the cost function becomes  
 394 variational free energy with optimal prior beliefs (for BSS), whose global minimum ensures  
 395 Bayes optimal encoding.

396 In short, we identify a class of biologically plausible cost functions from which the update  
 397 rules for both neural activity and synaptic plasticity can be derived. When the activation  
 398 function for neural activity is a sigmoid function, a cost function in this class is expressed  
 399 straightforwardly as variational free energy. With respect to the choice of constants

400 expressing physiological constraints in the neural network, the cost function has degrees of  
 401 freedom that—from the Bayesian perspective—may be viewed as (potentially sub-optimal)  
 402 prior beliefs. We now illustrate the implicit inference and learning in neural networks, using  
 403 simulations of BSS.

404

405 **Numerical simulations.** Here, we simulate the dynamics of neural activity and synaptic  
 406 strengths when they perform a gradient descent on the cost function in Equation (22). We  
 407 consider a BSS comprising two hidden sources (or states) and 32 observations (or sensory  
 408 inputs), formulated as an MDP. The two hidden sources comprise four patterns:  $s_t =$   
 409  $s_{t1} \otimes s_{t2} = (0,0), (1,0), (0,1), (1,1)$ . An observation  $o_{ti}$  is generated through the likelihood  
 410 mapping  $A_i$ . We defined  $A_i$  with:

$$411 \quad \begin{cases} P(o_{ti} = 1 | s_t, A_i) = A_{i1..} = \left(0, \frac{3}{4}, \frac{1}{4}, 1\right) & \text{for } 1 \leq i \leq 16 \\ P(o_{ti} = 1 | s_t, A_i) = A_{i1..} = \left(0, \frac{1}{4}, \frac{3}{4}, 1\right) & \text{for } 1 \leq i \leq 32 \\ P(o_{ti} = 0 | s_t, A_i) = A_{i0..} = (1,1,1,1) - A_{i1..} & \text{for } 1 \leq i \leq 32 \end{cases} \quad (23)$$

412 Here, for example,  $A_{i110} = 3/4$  for  $1 \leq i \leq 16$  is the probability of  $o_{ti}$  taking one when  
 413  $s_t = (1,0)$ . The simulations continue over  $T = 10^4$  time steps.

414 First, we show that—as in (Isomura & Friston, 2018)—a network with a cost function with  
 415 optimised constants  $((\alpha_{k1}, \alpha_{k0}) = (-\ln 2, -\ln 2)$  and  $(\beta_{k1}, \beta_{k0}) = (\vec{0}, \vec{0}))$  performs BSS  
 416 successfully (Fig. 2). The responses of neuron 1 came to recognise source 1 after training,  
 417 indicating that neuron 1 learnt to encode source 1 (Fig. 2A). Conversely, neuron 2 learnt to  
 418 infer source 2 (Fig. 2B). This demonstrates that minimisation of the cost function, with  
 419 optimal constants, is equivalent to variational free energy minimisation—and is sufficient to  
 420 emulate BSS. Next, we quantified the dependency of BSS performance on the form of the  
 421 cost function, by varying the above constants (Fig. 3).

422 We found that changing  $(\alpha_{k1}, \alpha_{k0})$  from  $(-\ln 2, -\ln 2)$  led to failure of BSS. Because  
 423 neuron 1 encodes source 1 with optimal  $\alpha$ , the correlation between source 1 and the  
 424 response of neuron 1 is close to one, while the correlation between source 2 and its  
 425 response is almost zero. In case of sub-optimal  $\alpha$ , these correlations fall to around 0.5;  
 426 indicating that the response of neuron 1 encodes a mixture of source 1 and source 2 (Fig. 3A).  
 427 Moreover, a failure of BSS can be induced when the elements of  $\beta$  take values far from zero  
 428 (Fig. 3B). When the elements of  $\beta$  are generated from a zero mean Gaussian distribution,  
 429 the accuracy of BSS—measured using the correlation between sources and  
 430 responses—decreases as the standard deviation increases.

431

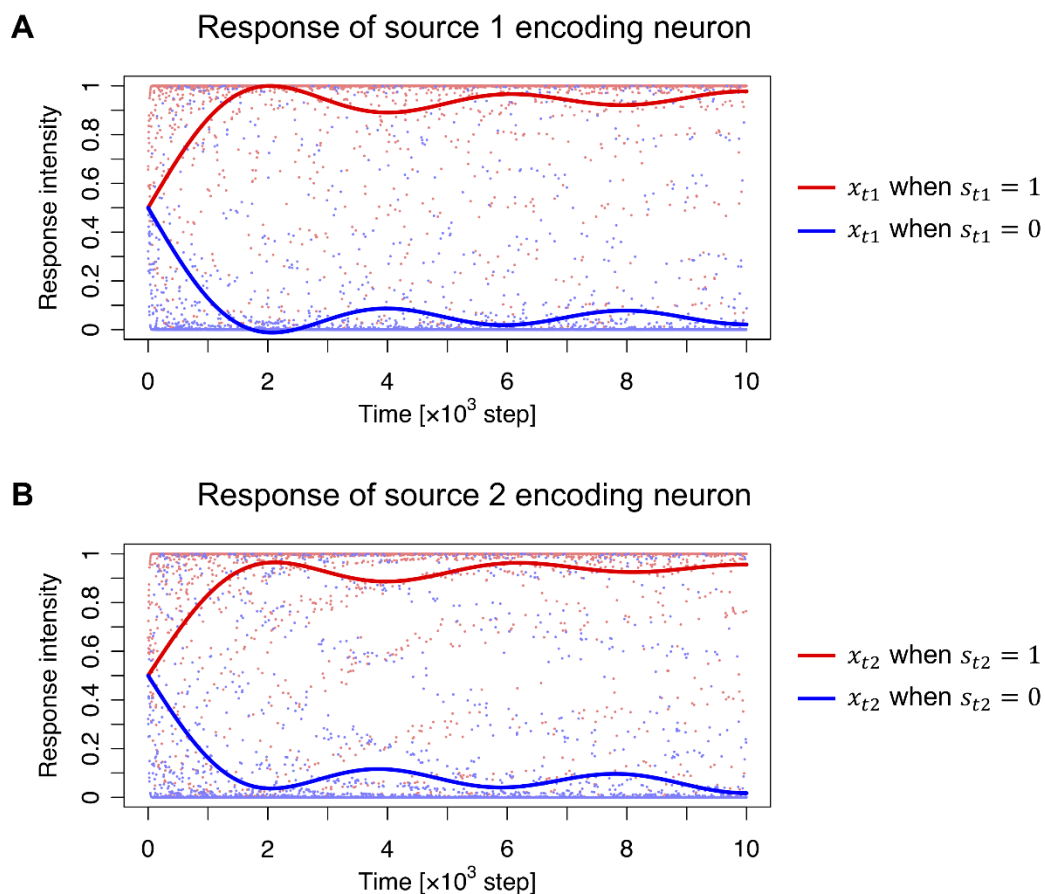

432

433 **Figure 2.** Emergence of response selectivity for a source. **(A)** Evolution of neuron 1's  
434 responses that learnt to encode source 1, in the sense that the response is high when source  
435 1 takes a value of one (red dots), and it is low when source 1 takes a value of zero (blue dots).  
436 Lines correspond to smoothed trajectories obtained using a discrete cosine transform. **(B)**  
437 Emergence of neuron 2's response that learnt to encode source 2. Codes are appended as  
438 Supplementary Source Codes.

439



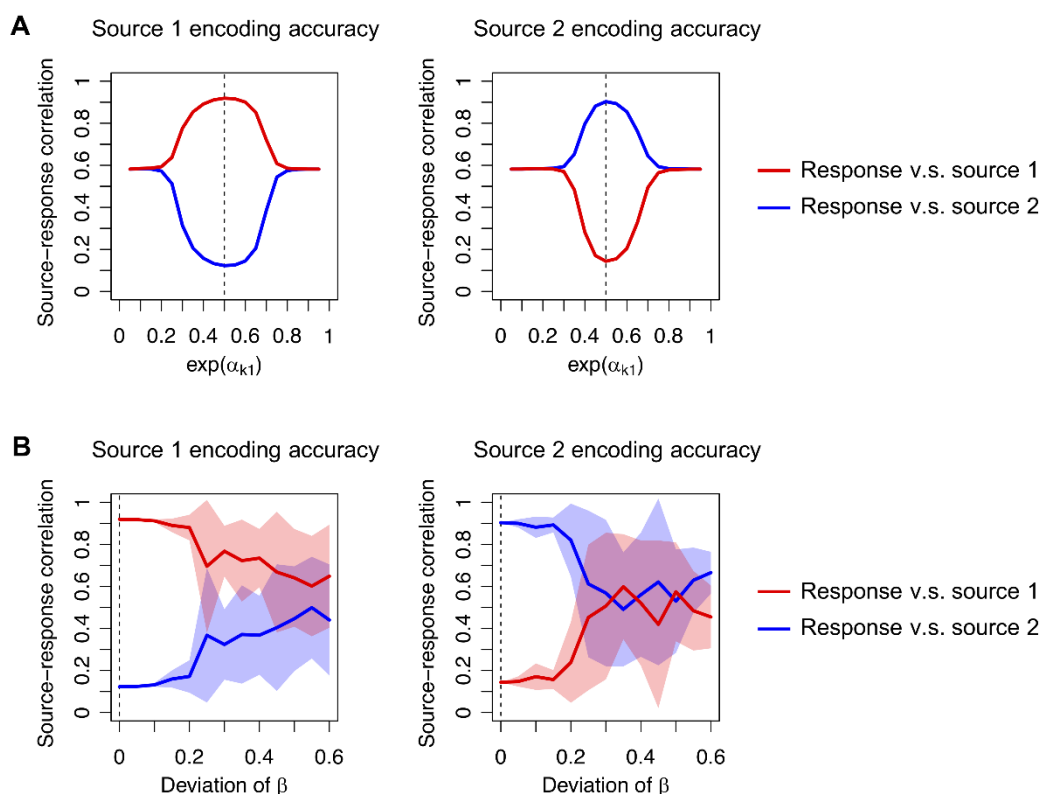

440

441 **Figure 3.** Dependence of source encoding accuracy on constants. Left panels show the  
 442 magnitudes of correlations between sources and response of a neuron expected to encode  
 443 source 1:  $|\text{corr}(s_{t1}, x_{t1})|$  and  $|\text{corr}(s_{t2}, x_{t1})|$ . The right panels show the magnitudes of the  
 444 correlations between sources and response of a neuron expected to encode source 2:  
 445  $|\text{corr}(s_{t1}, x_{t2})|$  and  $|\text{corr}(s_{t2}, x_{t2})|$ . **(A)** Dependence on the constant  $\alpha$  that controls the  
 446 excitability of a neuron, when  $\beta$  is fixed to zero. The dashed line (0.5) indicates the optimal  
 447 value of  $\exp(\alpha_{k1})$ . **(B)** Dependence on constant  $\beta$ , when  $\alpha$  is fixed as  $(\alpha_{k1}, \alpha_{k0}) =$   
 448  $(-\ln 2, -\ln 2)$ . Elements of  $\beta$  were randomly generated from a Gaussian distribution with  
 449 zero mean. The standard deviation of  $\beta$  was varied (horizontal axis), where zero deviation  
 450 was optimal (dashed line). Lines and shaded areas indicate the mean and standard deviation  
 451 of the source-response correlation, evaluated with 10 different values of  $\beta$ . Codes are  
 452 appended as Supplementary Source Codes.

453

454 Our numerical analysis, under assumptions 1–3 above, shows that a network needs to  
 455 employ a cost function that entails optimal prior beliefs to perform BSS, or equivalently  
 456 causal inference. Such a cost function is obtained when its constants, which do not appear in  
 457 the variational free energy, become negligible. The important message here is that, in this  
 458 setup, a cost function equivalent to variational free energy is necessary for Bayes optimal  
 459 inference (Friston et al., 2006; Friston, 2010).

460

461 **Phenotyping networks.** The parameters  $\phi_k = \ln D_k$  determine how the synaptic strengths  
462 change depending on the history of sensory inputs and neural outputs. The generic cost  
463 functions under consideration have free parameters regarding the choice of  $\phi_k$ . When  $\phi_k$   
464 is close to  $(-\ln 2, -\ln 2)$ , the cost function becomes variational free energy with optimal  
465 prior beliefs for BSS. We have therefore shown that variational free energy (under the MDP  
466 scheme) is within the class of biologically plausible cost functions found in neural networks.  
467 Conversely, one could regard neural networks—of the sort considered in this paper—as  
468 performing approximate Bayesian inference under priors that may or may not be optimal.  
469 Under the complete class theorem, this means that, in principle, any neural network of this  
470 kind is optimal, when its prior beliefs are consistent with the process generating outcomes.  
471 This perspective speaks of the possibility of characterising a neural network model—and  
472 indeed a real neuronal network—in terms of its implicit prior beliefs. It should be noted  
473 again that the complete class theorem suggests that any response of a neural network is  
474 Bayes optimal under some prior beliefs (and cost function). This means that a neural  
475 network can be characterised in terms of its implicit priors.

476 These considerations raise the possibility of using empirically observed neuronal  
477 responses to infer the prior beliefs implicit in a neuronal network. For example, the synaptic  
478 matrix ( $W_k$ ) can be estimated statistically from response data. By plotting its trajectory over  
479 the training period—as a function of the history of a Hebbian product—one can estimate the  
480 cost function constants. If these constants express a near-optimal  $\phi_k$ , it can be concluded  
481 that the network has, effectively, the right sort of priors for BSS. As we have shown  
482 analytically and numerically, a cost function with  $(\alpha_{k1}, \alpha_{k0})$  far from  $(-\ln 2, -\ln 2)$  or a  
483 large deviation of  $(\beta_{k1}, \beta_{k0})$  does not provide the Bayes optimal encoder for performing  
484 BSS. Since actual neuronal networks can perform BSS (Isomura et al., 2015; Isomura &  
485 Friston, 2018), it can be envisaged that the implicit cost function will exhibit a near-optimal  
486  $\phi_k$ .

487 One can pursue this analysis even further and model the responses or decisions of a  
488 neural network using the above-mentioned Bayes optimal MDP scheme under different  
489 priors. Thus, the priors in the MDP scheme can be adjusted to maximise the likelihood of  
490 empirical responses. This sort of approach has been used in systems neuroscience to  
491 characterise the choice behaviour in terms of subject specific priors. Please see  
492 (Schwartenbeck & Friston, 2016) for greater details.

493 Finally, from a practical perspective of optimising neural networks, understanding the  
494 formal relationship between cost functions and variational free energy allows one to specify  
495 the optimum values of any free parameters. In the present setting, one can effectively  
496 optimise the constants by updating the priors themselves, such that they minimise  
497 variational free energy. Under the Dirichlet form for the priors, the implicit threshold  
498 constants of the objective function can then be optimised using the following updates:

499 
$$\phi_k = \ln D_k = \psi(\mathbf{d}_k) - \psi(\mathbf{d}_{k1} + \mathbf{d}_{k0}),$$

500 
$$\mathbf{d}_k = d_k + \sum_{\tau=1}^t \mathbf{s}_{\tau k}. \quad (24)$$

501 Please see (Schwartenbeck & Friston, 2016) for more details. In effect, this update will simply  
502 add the Dirichlet concentration parameters,  $\mathbf{d}_k = (\mathbf{d}_{k1}, \mathbf{d}_{k0})$ , to the priors in proportion to  
503 the temporal summation of posterior expectations about the hidden states. Therefore, by  
504 committing to cost functions that underwrite variational inference and learning, any free  
505 parameter can be updated in a Bayes optimal fashion when a suitable generative model is  
506 available.

507

## 508 Discussion

509 In this work, we investigated a class of biologically plausible cost functions for neural  
510 networks. A single-layer feed-forward neural network with a sigmoid activation function that  
511 receives sensory inputs generated by hidden states (i.e. BSS setup) was considered. We  
512 identified a class of cost functions by assuming that neural activity and synaptic plasticity  
513 minimise a common function  $L$ . The derivative of  $L$  with respect to synaptic strengths  
514 furnishes a synaptic update rule—following Hebbian plasticity—equipped with  
515 activity-dependent homeostatic term. This cost function can be viewed as variational free  
516 energy, where prior beliefs about hidden states are expressed as biological constraints, in the  
517 form of thresholds and neuronal excitability.

518 One can understand the nature of the constants  $\{\alpha_{k1}, \alpha_{k0}, \beta_{k1}, \beta_{k0}\}$  from biological and  
519 Bayesian perspectives as follows:  $(\alpha_{k1}, \alpha_{k0})$  determines the firing threshold and thus  
520 controls the mean firing rates. Expressed differently, these parameters control the amplitude  
521 of excitatory and inhibitory inputs, which may be analogous to the roles of GABAergic inputs  
522 and neuromodulators in biological neuronal networks (Pawlak et al., 2010; Frémaux &  
523 Gerstner, 2016; Kuśmierz et al., 2017). At the same time,  $(\alpha_{k1}, \alpha_{k0})$  encodes prior beliefs  
524 about states, which exert a large influence on the state posterior. The state posterior is  
525 biased if  $(\alpha_{k1}, \alpha_{k0})$  is picked in a sub-optimal way—in relation to the process generating  
526 inputs. In contrast,  $(\beta_{k1}, \beta_{k0})$  determines the accuracy of synaptic strengths representing  
527 the likelihood mapping of an observation  $o_{ti}$  taking 1 (ON state) depending on hidden  
528 states (please compare Equation (8) and Equation (20)). Only when  $(\beta_{k1}, \beta_{k0}) = (\vec{0}, \vec{0})$ , the  
529 encoder becomes Bayesian optimal. These constants could represent biological constraints  
530 on synaptic strengths, such as the range of spine growth, spinal fluctuations, or the effect of  
531 synaptic plasticity induced by spontaneous activity independent of external inputs. Although  
532 the fidelity of each synapse is limited due to such internal fluctuations, the accumulation of  
533 information over a large number of synapses should enable the accurate encoding of hidden  
534 states in the current formulation.

535 We have shown in previous reports that *in vitro* neural networks—comprising a cortical  
536 cell culture—performed BSS when receiving electrical stimulations generated from two  
537 hidden sources (Isomura et al., 2015). Furthermore, we showed that minimising variational  
538 free energy under an MDP was sufficient to reproduce the learning observed in an *in vitro*  
539 network (Isomura & Friston, 2018). Our framework for identifying biologically plausible cost  
540 functions could be relevant in identifying the principles that underwrite learning or  
541 adaptation processes in biological neuronal networks, using empirical response data. Herein,  
542 we have illustrated this potential in terms of the choice of function  $\phi_k$  in the cost functions  
543 above: if  $\phi_k$  is close to a constant  $(-\ln 2, -\ln 2)$ , the cost function is expressed  
544 straightforwardly as a variational free energy with small prior biases. In the subsequent work,  
545 we intend to apply this scheme to empirical data and examine the biological plausibility of  
546 variational free energy minimisation.

547 In summary, we have identified a class of biologically plausible cost functions that explain  
548 neural activity and synaptic plasticity. A cost function in the class becomes Bayes optimal  
549 when, and only when, several constants expressing biological constraints correspond to  
550 appropriate priors in implicit generative model. Estimating these constants from empirical  
551 data may be a useful approach to characterise learning and inference in terms of a neural  
552 network's priors.

553

## 554 References

- 555 Albus, J. S. (1971). A theory of cerebellar function. *Math. Biosci.* **10**, 25-61.
- 556 Bastos, A. M., Usrey, W. M., Adams, R. A., Mangun, G. R., Fries, P. & Friston, K. J. (2012).  
557 Canonical microcircuits for predictive coding. *Neuron* **76**, 695-711.
- 558 Belouchrani, A., Abed-Meraim, K., Cardoso, J.F. & Moulines, E. (1997). A blind source  
559 separation technique using second-order statistics. *IEEE Trans. Signal Process.* **45**,  
560 434-444.
- 561 Brown, G. D., Yamada, S. & Sejnowski, T. J. (2001). Independent component analysis at the  
562 neural cocktail party. *Trends Neurosci.* **24**, 54-63.
- 563 Brown, L. D. (1981). A complete class theorem for statistical problems with finite-sample  
564 spaces. *Ann. Stat.* **9**, 1289-1300.
- 565 Cichocki, A., Zdunek, R., Phan, A. H. & Amari, S. I. (2009). *Nonnegative Matrix and Tensor*  
566 *Factorizations: Applications to Exploratory Multi-way Data Analysis and Blind Source*  
567 *Separation*. John Wiley & Sons.
- 568 Comon, P. & Jutten, C. (2010). *Handbook of Blind Source Separation: Independent*  
569 *Component Analysis and Applications*. Academic Press.
- 570 Dauwels, J. (2007). On variational message passing on factor graphs. *Info. Theory, 2007. ISIT*  
571 *2007. IEEE Int. Sympo., IEEE*.
- 572 Dayan, P., Hinton, G. E., Neal, R. M. & Zemel, R. S. (1995). The Helmholtz machine. *Neural*  
573 *Comput.* **7**, 889-904.
- 574 DiCarlo, J. J., Zoccolan, D. & Rust, N. C. (2012). How does the brain solve visual object

- 575 recognition? *Neuron* **73**, 415-434.
- 576 Forney, G. D. (2001). Codes on graphs: Normal realizations. *IEEE Trans. Info. Theory* **47**,  
577 520-548.
- 578 Frémaux, N. & Gerstner, W. (2016). Neuromodulated spike-timing-dependent plasticity, and  
579 theory of three-factor learning rules. *Front. Neural Circuits* **9**.
- 580 Friston, K. (2005). A theory of cortical responses. *Philos. Trans. R. Soc. Lond. B Biol. Sci.* **360**,  
581 815-836.
- 582 Friston, K., Kilner, J. & Harrison, L. (2006). A free energy principle for the brain. *J. Physiol.*  
583 *Paris* **100**, 70-87.
- 584 Friston, K. (2010). The free-energy principle: a unified brain theory?. *Nat. Rev. Neurosci.* **11**,  
585 127-138.
- 586 Friston, K., Mattout, J., & Kilner, J. (2011). Action understanding and active inference. *Biol.*  
587 *Cybern.* **104**, 137-160.
- 588 Friston, K., FitzGerald, T., Rigoli, F., Schwartenbeck, P. & Pezzulo, G. (2016). Active inference  
589 and learning. *Neurosci. Biobehav. Rev.* **68**, 862-879.
- 590 Friston, K., FitzGerald, T., Rigoli, F., Schwartenbeck, P. & Pezzulo, G. (2017). Active inference:  
591 A process theory. *Neural Comput.* **29**, 1-49.
- 592 Friston, K. J., Parr, T. & de Vries, B. D. (2017). The graphical brain: belief propagation and  
593 active inference. *Netw. Neurosci.* **1**, 381-414.
- 594 George, D. & Hawkins, J. (2009). Towards a mathematical theory of cortical micro-circuits.  
595 *PLoS Comput. Biol.* **5**, e1000532.
- 596 von Helmholtz, H. (1925). *Treatise on physiological optics (Vol. 3)*. The Optical Society of  
597 America.
- 598 Isomura, T., Kotani, K. & Jimbo, Y. (2015). Cultured cortical neurons can perform blind source  
599 separation according to the free-energy principle. *PLoS Comput. Biol.* **11**, e1004643.
- 600 Isomura, T. & Friston, K. (2018). In vitro neural networks minimise variational free energy. *Sci.*  
601 *Rep.* **8**, 16926.
- 602 Knill, D. C. & Pouget, A. (2004). The Bayesian brain: the role of uncertainty in neural coding  
603 and computation. *Trends Neurosci.* **27**, 712-719.
- 604 Kullback, S. & Leibler, R. A. (1951). On information and sufficiency. *Ann. Math. Stat.* **22**,  
605 79-86.
- 606 Kuśmierz, Ł., Isomura, T. & Toyozumi, T. (2017). Learning with three factors: modulating  
607 Hebbian plasticity with errors. *Curr. Opin. Neurobiol.* **46**, 170-177.
- 608 Lee, T. W., Girolami, M., Bell, A. J. & Sejnowski, T. J. (2000). A unifying information-theoretic  
609 framework for independent component analysis. *Comput. Math. Appl.* **39**, 1-21.
- 610 Linsker, R. (1988). Self-organization in a perceptual network. *Computer* **21**, 105-117.
- 611 Mary, D. (1969). A theory of cerebellar cortex. *J. Physiol.* **202**, 437-470.
- 612 Pawlak, V., Wickens, J. R., Kirkwood, A. & Kerr, J. N. (2010). Timing is not everything:  
613 neuromodulation opens the STDP gate. *Front. Syn. Neurosci.* **2**, 146.
- 614 Rao, R. P. & Ballard, D. H. (1999). Predictive coding in the visual cortex: a functional  
615 interpretation of some extra-classical receptive-field effects. *Nat. Neurosci.* **2**, 79-87.
- 616 Schultz, W., Dayan, P., & Montague, P. R. (1997). A neural substrate of prediction and reward.

617 *Science* **275**, 1593-1599.

618 Schwartenbeck, P., & K. Friston. (2016). Computational phenotyping in psychiatry: a worked  
619 example. *eNeuro* **3**, e0049-16.2016.

620 Sutton, R. S. & Barto, A. G. (1998). *Reinforcement Learning*. MIT Press, Cambridge, MA, USA.

621 Wald, A. (1947). An essentially complete class of admissible decision functions. *Ann. Math.*

622 *Stat.* **18**, 549-555.

623

## 624 **Acknowledgements**

625 T.I. is funded by RIKEN Center for Brain Science. K.J.F. is funded by a Wellcome Principal  
626 Research Fellowship (Ref: 088130/Z/09/Z). The funders had no role in study design, data  
627 collection and analysis, decision to publish, or preparation of the manuscript.

628

629

630

631 **Supplementary Information**

632

633 **Supplementary Tables**

634

635

**Table S1.** Correspondence of variables and functions.

| Neural network formation |             |                   | Variational Bayes formation                                                          |                     |
|--------------------------|-------------|-------------------|--------------------------------------------------------------------------------------|---------------------|
| Neural activity          | $x_{tk}$    | $\Leftrightarrow$ | $\mathbf{s}_{tk1}$                                                                   | State posterior     |
| Sensory input            | $y_t$       | $\Leftrightarrow$ | $o_{t-1}$                                                                            | Observation         |
| Synaptic strength        | $W_{k1}$    | $\Leftrightarrow$ | $\text{sig}^{-1}(\mathbf{A}_{\cdot 1k1})$                                            |                     |
|                          | $V_{k1}$    | $\Leftrightarrow$ | $\mathbf{A}_{\cdot 1k1}$                                                             | Parameter posterior |
| Perturbation term        | $\phi_{k1}$ | $\Leftrightarrow$ | $\ln D_{k1}$                                                                         | State prior         |
| Threshold                | $h_{k1}$    | $\Leftrightarrow$ | $\ln(\vec{\mathbf{1}} - \mathbf{A}_{\cdot 1k1}) \cdot \vec{\mathbf{1}} + \ln D_{k1}$ |                     |

636

637 **Supplementary Methods**

638 **S1. The order of the parameter complexity**

639 The order of the complexity term:  $(\mathbf{a}_i - a_i) \cdot \ln \mathbf{A}_i - \ln \mathcal{B}(\mathbf{a}_i)$  is calculated. The first term  
 640 becomes  $(\mathbf{a}_i - a_i) \cdot \ln \mathbf{A}_i = \mathbf{a}_i \cdot \ln \mathbf{A}_i + \mathcal{O}(1)$  since  $a_i \cdot \ln \mathbf{A}_i$  is in the order of 1.  
 641 Moreover, since  $\Gamma(\mathbf{a}_{i1}) = \mathbf{a}_{i1} \cdot \ln \mathbf{a}_{i1} + \mathcal{O}(\ln t)$ , we get  $\ln \mathcal{B}(\mathbf{a}_i) = \ln \Gamma(\mathbf{a}_{i1}) + \ln \Gamma(\mathbf{a}_{i0}) -$   
 642  $\ln \Gamma(\mathbf{a}_{i1} + \mathbf{a}_{i0}) = \mathbf{a}_{i1} \cdot \ln \mathbf{a}_{i1} + \mathbf{a}_{i0} \cdot \ln \mathbf{a}_{i0} - (\mathbf{a}_{i1} + \mathbf{a}_{i0}) \cdot \ln(\mathbf{a}_{i1} + \mathbf{a}_{i0}) + \mathcal{O}(\ln t) = \mathbf{a}_i \cdot$   
 643  $\ln \mathbf{A}_i + \mathcal{O}(\ln t)$ . Thus, it holds that  $(\mathbf{a}_i - a_i) \cdot \ln \mathbf{A}_i - \ln \mathcal{B}(\mathbf{a}_i) = \mathcal{O}(\ln t)$ . Hence, we obtain

644 
$$F(\tilde{o}, Q(\tilde{s}), Q(A)) = \sum_{\tau=1}^t (\mathbf{s}_{\tau} \cdot \ln \mathbf{s}_{\tau} - \mathbf{s}_{\tau} \cdot \ln \mathbf{A} \cdot o_{\tau} - \mathbf{s}_{\tau} \cdot \ln D) + \mathcal{O}(\ln t). \quad (25)$$

645 Under the current generative model comprising binary hidden states and binary  
 646 observations, the optimal posterior expectation of  $\mathbf{A}$  can be obtained up to the order of  
 647  $\ln t / t$  even when  $\mathcal{O}(\ln t)$  term in Equation (25) is neglected. Solving the variation of  $F$  with

648 respect to  $\mathbf{A}_{\cdot 1}$  yields the optimal posterior expectation. From  $\mathbf{A}_{\cdot 0} = \vec{\mathbf{1}} - \mathbf{A}_{\cdot 1}$ , we find

649 
$$\delta F = - \sum_{\tau=1}^t \left( \mathbf{s}_{\tau} \cdot \delta \ln \mathbf{A}_{\cdot 1} \cdot o_{\tau-1} + \mathbf{s}_{\tau} \cdot \delta \ln(\vec{\mathbf{1}} - \mathbf{A}_{\cdot 1}) \cdot (\vec{\mathbf{1}} - o_{\tau-1}) \right)$$

650 
$$= -(\delta \mathbf{A}_{\cdot 1} \odot \mathbf{A}_{\cdot 1}^{\ominus-1}) \cdot \overline{o_{t-1} \otimes \mathbf{s}_t} + \left( \delta \mathbf{A}_{\cdot 1} \odot (\vec{\mathbf{1}} - \mathbf{A}_{\cdot 1})^{\ominus-1} \right) \cdot \overline{(\vec{\mathbf{1}} - o_{t-1}) \otimes \mathbf{s}_t}$$



$$\begin{aligned}
 651 \quad &= \left( \delta \mathbf{A}_{\cdot 1} \odot \mathbf{A}_{\cdot 1}^{\odot -1} \odot (\vec{\mathbf{1}} - \mathbf{A}_{\cdot 1})^{\odot -1} \right) \cdot \left( -(\vec{\mathbf{1}} - \mathbf{A}_{\cdot 1}) \odot \overline{o_{t-1} \otimes \mathbf{s}_t} + \mathbf{A}_{\cdot 1} \odot \overline{(\vec{\mathbf{1}} - o_{t-1}) \otimes \mathbf{s}_t} \right) \\
 652 \quad &= \left( \delta \mathbf{A}_{\cdot 1} \odot \mathbf{A}_{\cdot 1}^{\odot -1} \odot (\vec{\mathbf{1}} - \mathbf{A}_{\cdot 1})^{\odot -1} \right) \cdot \left( \mathbf{A}_{\cdot 1} \odot \overline{\vec{\mathbf{1}} \otimes \mathbf{s}_t} - \overline{o_{t-1} \otimes \mathbf{s}_t} \right) \quad (26)
 \end{aligned}$$

653 up to the order of  $\ln t$ . Here,  $\mathbf{A}_{\cdot 1}^{\odot -1}$  indicates the element-wise inverse of  $\mathbf{A}_{\cdot 1}$ . From  $\delta F =$   
 654 0, we find

$$655 \quad \mathbf{A}_{\cdot 1} = \overline{o_{t-1} \otimes \mathbf{s}_t} \odot \left( \overline{\vec{\mathbf{1}} \otimes \mathbf{s}_t} \right)^{\odot -1} + \mathcal{O}\left(\frac{\ln t}{t}\right). \quad (27)$$

656 Therefore, we obtain the same result as Equation (8) up to the order of  $\ln t / t$ .

657

## 658 S2. Derivation of synaptic plasticity rule

659 We consider synaptic strengths at time  $t$ :  $W_{k1} = W_{k1}(t)$  and define the change as  
 660  $\Delta W_{k1} \equiv W_{k1}(t+1) - W_{k1}(t)$ . From Equation (15),  $h'_1(W_{k1})$  satisfies both

$$661 \quad h'_1(W_{k1} + \Delta W_{k1}) - h'_1(W_{k1}) = h''_1(W_{k1}) \odot \Delta W_{k1} + \mathcal{O}(|\Delta W_{k1}|^2) \quad (28)$$

662 and

$$\begin{aligned}
 663 \quad &h'_1(W_{k1} + \Delta W_{k1}) - h'_1(W_{k1}) = -\frac{x_{(t+1)k}y_{t+1} + \overline{x_{tk}y_t}}{x_{(t+1)k} + \overline{x_{tk}}} + \frac{\overline{x_{tk}y_t}}{\overline{x_{tk}}} \\
 664 \quad &= -\frac{x_{(t+1)k}y_{t+1}}{\overline{x_{tk}}} + \frac{\overline{x_{tk}y_t}}{\overline{x_{tk}}^2} x_{(t+1)k} = -\frac{1}{\overline{x_{tk}}} \left( x_{(t+1)k}y_{t+1} - h'_1(W_{k1})x_{(t+1)k} \right). \quad (29)
 \end{aligned}$$

665 Thus, we find

$$666 \quad \Delta W_{k1} = \underbrace{-\frac{h''_1(W_{k1})^{\odot -1}}{\overline{x_{tk}}}}_{\text{adaptive learning rate}} \odot \left( \underbrace{x_{(t+1)k}y_{t+1}}_{\text{Hebbian term}} - \underbrace{h'_1(W_{k1})x_{(t+1)k}}_{\text{homeostatic term}} \right). \quad (30)$$

667 Similarly,

$$668 \quad \Delta W_{k0} = \underbrace{-\frac{h''_0(W_{k0})^{\odot -1}}{1 - \overline{x_{tk}}}}_{\text{adaptive learning rate}} \odot \left( \underbrace{(1 - x_{(t+1)k})y_{t+1}}_{\text{anti-Hebbian term}} - \underbrace{h'_0(W_{k0})(1 - x_{(t+1)k})}_{\text{homeostatic term}} \right). \quad (31)$$

669 These plasticity rules express (anti-) Hebbian plasticity with a homeostatic term.

670
